# Supplementary material for: Single-cell transcriptomics reveals immune suppression and cell states predictive of patient outcomes in rhabdomyosarcoma
Source: PubMed Central journal article supplement (PMC10224926; doi:10.1038/s41467-023-38886-8), 2023-05-27
Supplement: 41467_2023_38886_MOESM2_ESM.pdf [file 41467_2023_38886_MOESM2_ESM.pdf]

### **Description of Additional Supplementary Files**

File Name: Supplementary Data 1

Description: Detailed overview of RMS patient and sample characteristics

File Name: Supplementary Data 2

Description: FN meta-program gene weights

File Name: Supplementary Data 3

Description: FP meta-program gene weights
